# Supplementary material
Source: Springer Nature journal article supplement (https://www.springermedizin.de/resource/supplementary/12937_2009_278_MOESM2_ESM.pdf/25654770)

Mean Z-scores Over Time by Each Treatment – Weight-for-Length

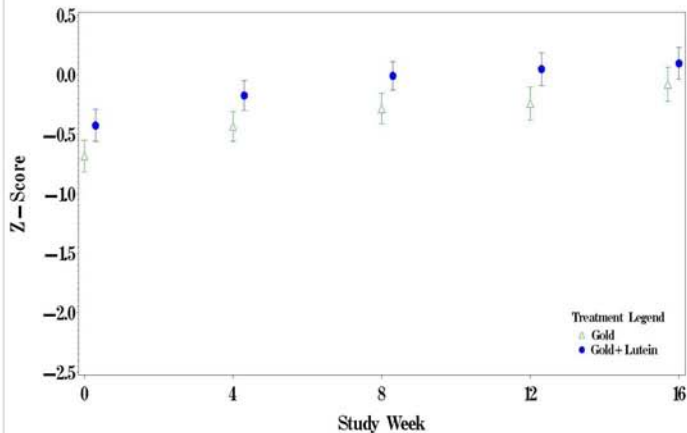

Summary of Growth at Each Visit – Weight-for-Age Z-Score

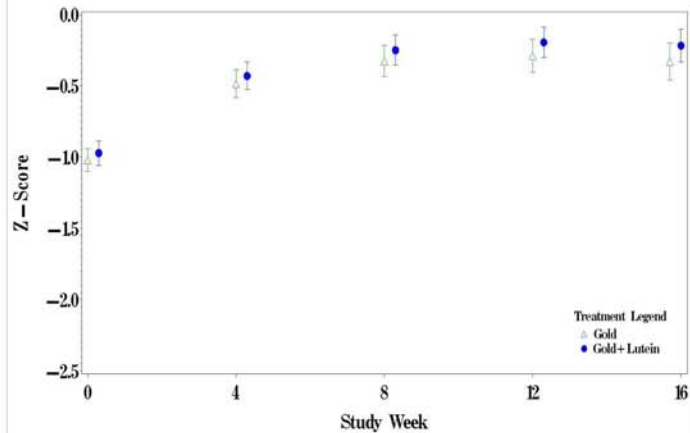

Mean Z-scores Over Time by Each Treatment – Head Circumference-for-Age

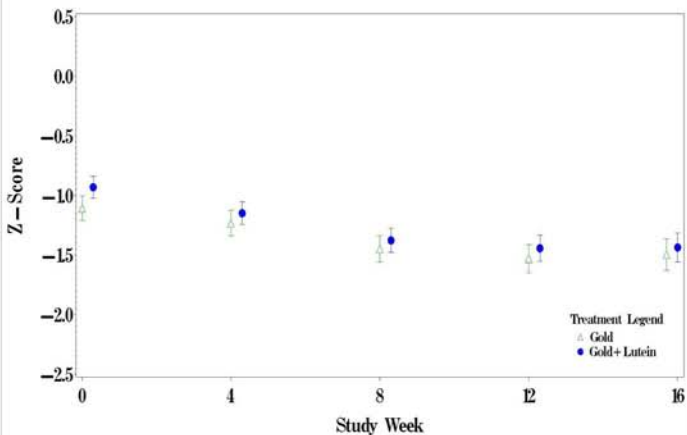

Mean Z-scores Over Time by Each Treatment – Length-for-Age

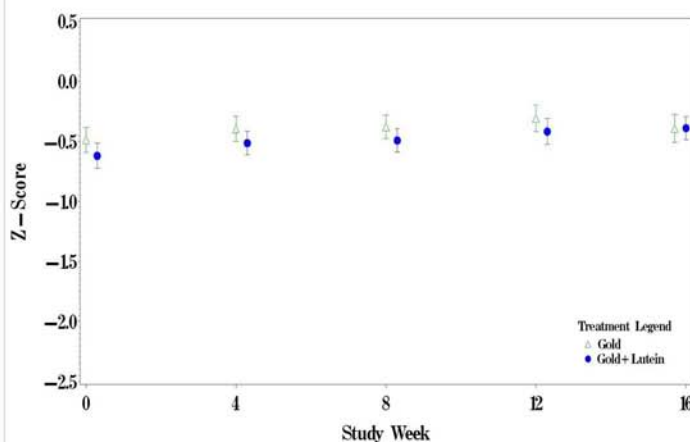

Supplement: MOESM2 [file 25654770]
